# Supplementary material
Source: PubMed Central journal article supplement (PMC7979485)
Supplement: NIHMS1667206-supplement-1.pdf [file NIHMS1667206-supplement-1.pdf]

# Supplementary Information

## **Presynaptic Kv3 channels are required for fast and slow endocytosis of synaptic vesicles**

Xin-Sheng Wu, Shobana Subramanian, Yalan Zhang, Bo Shi, Jessica Xia, Tiansheng Li, Xiaoli Guo, Lynda El-Hassar, Klara Szigeti-Buck, Jorge Henao-Mejia, Richard A. Flavell, Tamas L. Horvath, Elizabeth A. Jonas, Leonard K. Kaczmarek and Ling-Gang Wu

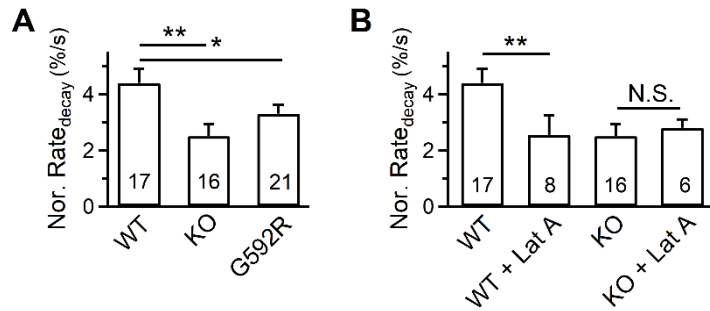

**Figure S1. Kv3.3 KO or Kv3.3<sup>G592R</sup> KI reduced the normalized Rate<sub>decay</sub> at hippocampal synapses, related to Figure 4.**

(A) The normalized Rate<sub>decay</sub> (Nor. Rate<sub>decay</sub>) after 200 APs at 20 Hz in WT, Kv.3.3<sup>-/-</sup> (KO), or Kv3.3<sup>G592R</sup> boutons at 34-37°C. The normalized Rate<sub>decay</sub> was measured from F<sub>SypH</sub> with a different normalization method:  $\Delta F$ , the F<sub>SypH</sub> increase induced by the 200-AP train, but not the F<sub>SypH</sub> baseline, was normalized as 100%. \*\*: p < 0.01 (comparison between KO and WT); \*: p < 0.05 (comparison between Kv3.3<sup>G592R</sup> and WT boutons); statistical test is t test. The experimental number is written inside the bar; each experiment contained 20-30 boutons; 1-3 experiments were taken from 1 culture; each culture was from 3-5 mice.

The normalization method used here removed the impact of  $\Delta F$  on the measurement of the Rate<sub>decay</sub>. The results shown in panel A are similar to those (See Figures 4E and 4F) without such normalization, indicating that the results drawn from Figures 4E and 4F are independent of the changes in  $\Delta F$ .

(B) Similar to panel A, except from WT boutons, WT boutons in the presence of 20  $\mu$ M latrunculin A (WT + Lat A), Kv.3.3<sup>-/-</sup> boutons (KO), or KO boutons in the presence of 20  $\mu$ M latrunculin A (KO + Lat A). \*\*: p < 0.01 (comparison between WT and WT+Lat A); N.S.: not significant, p > 0.05 (comparison between KO and KO + Lat A); statistical test is t test.

The results shown in panel B are similar to those (See Figures 4I and 4J) without such normalization, indicating that the results drawn from Figures 4I and 4J are independent of changes in  $\Delta F$ .

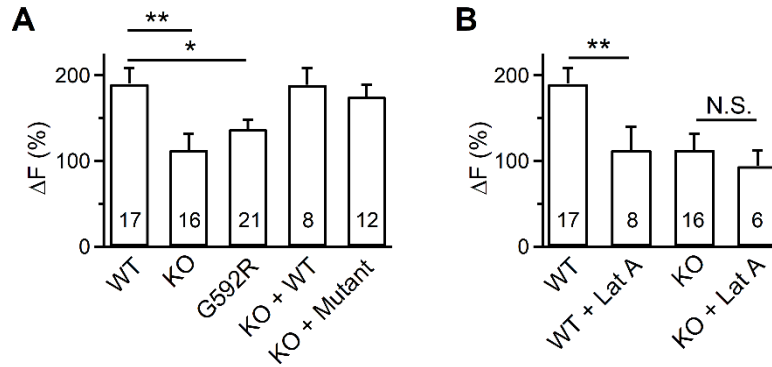

**Figure S2. Peak SypH fluorescence increase induced by 200 APs at 20 Hz in various conditions, related to Figure 4.**

- (A) Peak SypH fluorescence increase induced by 200 APs at 20 Hz ( $\Delta F$ , mean + s.e.m.) at hippocampal cultures in five conditions: 1) WT boutons, 2)  $Kv3.3^{-/-}$  boutons (KO), 3)  $Kv3.3_{G592R}$  boutons, 4)  $Kv3.3^{-/-}$  boutons overexpressed with WT  $Kv3.3$  (KO + WT), 5)  $Kv3.3^{-/-}$  boutons overexpressed with W496F  $Kv3.3$  mutant with no ionic conductance (KO + Mutant). \*\*:  $p < 0.01$  (comparison between WT and KO); \*:  $p < 0.05$  (comparison between WT and  $Kv3.3_{G592R}$ ); statistical test is t test. The experimental number is written inside the bar; each experiment contained 20-30 boutons; 1-3 experiments were taken from 1 culture; each culture was from 3-5 mice.
- (B) Similar to A, except from different conditions: 1) WT boutons, 2) WT boutons in the presence of 20  $\mu M$  latrunculin A (WT + Lat A), 3)  $Kv3.3^{-/-}$  boutons (KO), and 4) KO boutons in the presence of 20  $\mu M$  latrunculin A (KO + Lat A). \*\*:  $p < 0.01$  (comparison between WT and WT + Lat A); N.S.: not significant,  $p > 0.05$  (comparison between KO and KO + Lat A); statistical test is t test.

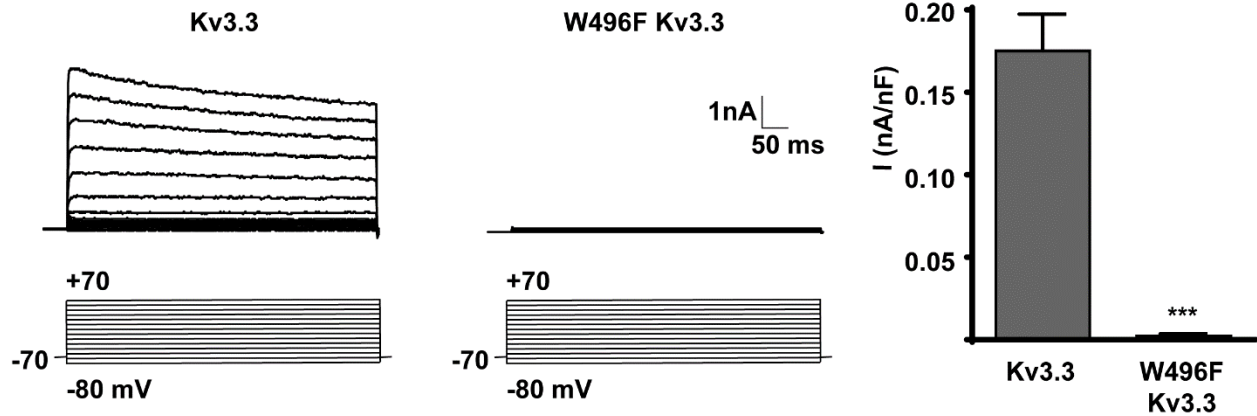

**Figure S3. W496F Kv3.3 mutation abolishes potassium currents in CHO cells, related to Figure 4.**

**Left and Middle:** representative traces of currents recorded in CHO cells expressing wild type Kv3.3 or W496F Kv3.3. Currents were evoked from a holding potential of -70 mV to test potentials between -80 mV and +70 mV in 10 mV increments.

**Right:** bar graph shows group data for current density recorded at +70 mV. Current density was calculated by dividing the peak current by cell capacitance. Values are shown as mean  $\pm$  s.e.m. (n = 4, 4), and significance was tested using an unpaired two-tailed t- test, \*\*\*p=0.0002.

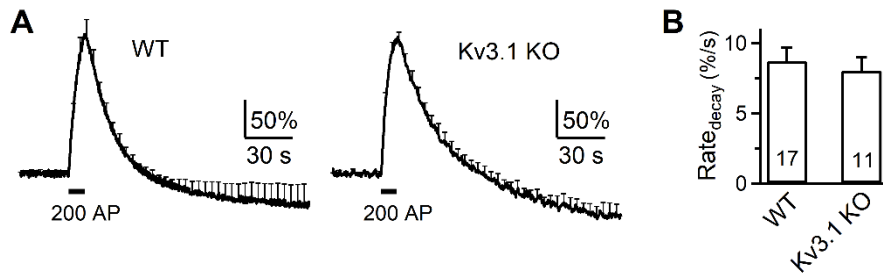

**Figure S4. Kv3.1 knockout did not affect endocytosis at hippocampal synapses, related to Figure 4.**

(A-B)  $F_{SypH}$  (mean + s.e.m., A) and  $Rate_{decay}$  (mean + s.e.m., B) induced by 200 APs at 20 Hz in WT and Kv3.1<sup>-/-</sup> (Kv3.1 KO) boutons at 34-37°C.  $F_{SypH}$  (A) was normalized to baseline; s.e.m. (A) is plotted every 4 s. The experimental number is written inside the bar of panel B, which also applies to panel A.  $Rate_{decay}$  in panel B is not significantly different ( $p > 0.05$ , t test).
